# Supplementary material
Source: publisher site journal article supplement (https://www.spandidos-publications.com/2849/downloadSupplementary)

Figure S1. Regulation of EGFR, p-EGFR and HIF-1 $\alpha$  expression by mdig under normoxic and hypoxic conditions. (A) Reverse transcription-quantitative PCR results showed that there was no transcriptional regulation of EGFR and HIF-1 $\alpha$  by mdig. \* $P < 0.05$ , \*\* $P < 0.01$ , LV-mdig vs. LV-con and LV-mdig-RNAi vs. LV-mdig-RNAi-con. (B) Densitometry analysis (LV-mdig/LV-con) of EGFR and p-EGFR in mdig-overexpressing A549 and H1299 cells. \* $P < 0.05$ , p-EGFR vs. EGFR. (C) Co-immunoprecipitation analysis revealed no direct interactions between mdig and EGFR or HIF-1 $\alpha$  at the protein levels in mdig-overexpressing A549 cells. mdig, mineral dust-induced gene; EGFR, epidermal growth factor receptor; HIF-1 $\alpha$ , hypoxia-inducible factor-1 $\alpha$ ; p-, phospho; LV, lentivirus; RNAi, RNA interference; con, control.

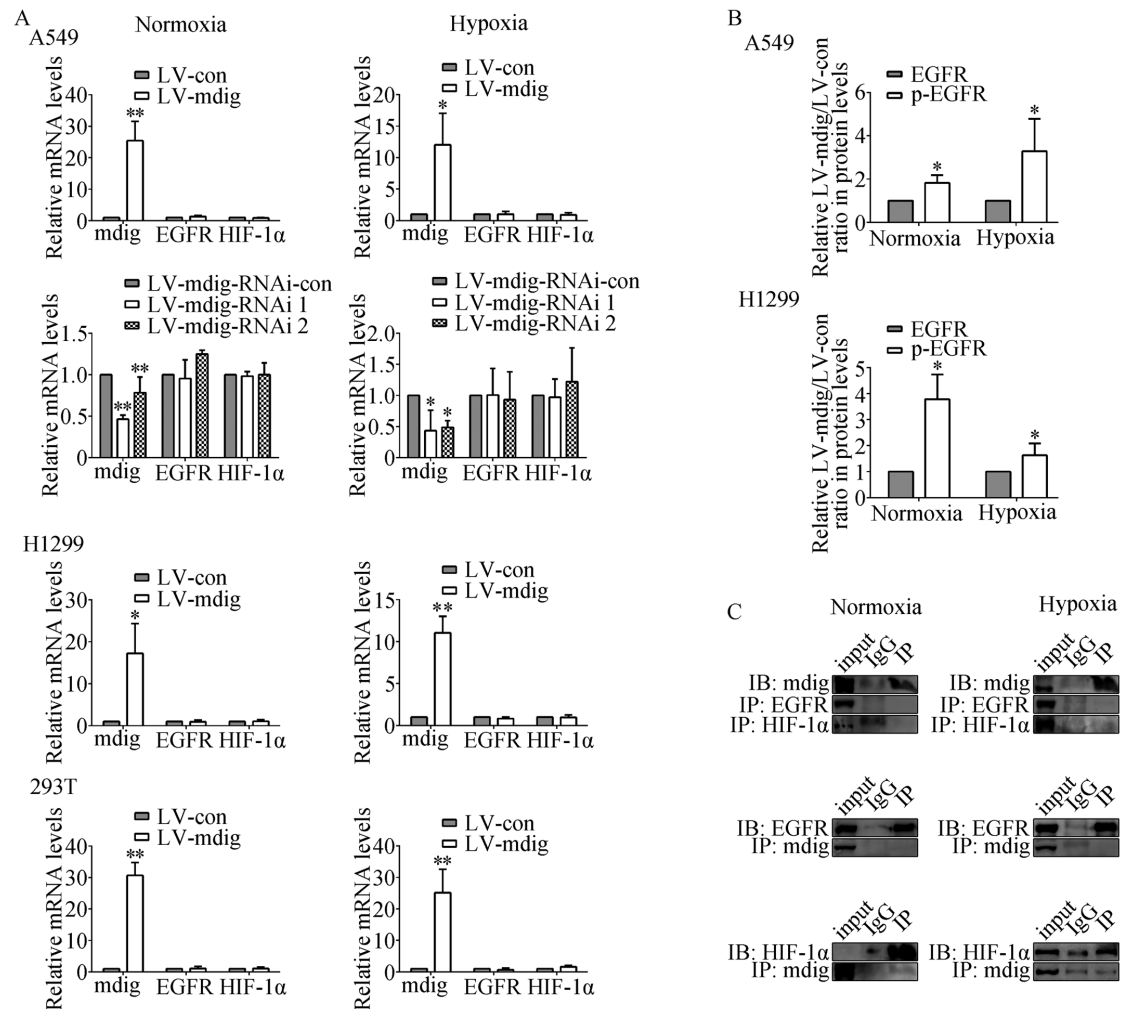

Supplement: Supplementary file 1 [file downloadSupplementary]
